# Supplementary material for: Identification and Antimicrobial Resistance of Dermatophilus congolensis from Cattle in Saint Kitts and Nevis
Source: MDPI journal article supplement (doi:10.3390/vetsci8070135), 2021-07-16
Supplement: s1 [file s1]

**Table S1.** List of obtained isolates with MALDI-TOF species identification and score value.

| Sample ID         | species ID                       | Score Value | Farm identifier |
|-------------------|----------------------------------|-------------|-----------------|
| 19-027-761 Scab   | <i>Dermatophilus congolensis</i> | 2.09        | St. Peters      |
| 19-034-H1BF Swab  | <i>Dermatophilus congolensis</i> | 1.75        | St. Peters      |
| 19-034-H1BF Scab  | <i>Dermatophilus congolensis</i> | 2.13        | St. Peters      |
| 19-039-772 Scab   | <i>Dermatophilus congolensis</i> | 2.09        | St. Pauls       |
| 19-041-770 Scab   | <i>Dermatophilus congolensis</i> | 1.99        | St. Pauls       |
| 19-029-754 Scab   | <i>Dermatophilus congolensis</i> | 2.01        | Old Road        |
| 19-025-765 Scab   | <i>Dermatophilus congolensis</i> | 1.77        | St. Peters      |
| 19-023-762 Swab   | <i>Dermatophilus congolensis</i> | 1.75        | St. Peters      |
| 19-042-769 Scab   | <i>Dermatophilus congolensis</i> | 2.00        | St. Pauls       |
| 19-037-766 Scab   | <i>Dermatophilus congolensis</i> | 1.89        | St. Pauls       |
| 19-035-BF Swab    | <i>Dermatophilus congolensis</i> | 1.85        | St. Peters      |
| 19-032-762 Scab   | <i>Dermatophilus congolensis</i> | 1.79        | St. Peters      |
| 19-033-BF2 Swab   | <i>Dermatophilus congolensis</i> | 2.07        | St. Peters      |
| 19-040-358 Scab   | <i>Dermatophilus congolensis</i> | 1.94        | St. Pauls       |
| 19-015-76 Swab    | <i>Dermatophilus congolensis</i> | 1.93        | Halfway Tree    |
| 19-015-76 Scab    | <i>Dermatophilus congolensis</i> | 1.72        | Halfway Tree    |
| 19-018-Wilm Scab  | <i>Dermatophilus congolensis</i> | 2.13        | Buckleys        |
| 19-018-Wilm Swab  | <i>Dermatophilus congolensis</i> | 1.89        | Buckleys        |
| 19-021-Calv Swab  | <i>Dermatophilus congolensis</i> | 2.17        | Buckleys        |
| 19-021-Calv Scab  | <i>Dermatophilus congolensis</i> | 1.85        | Buckleys        |
| 19-020-Edri Scab  | <i>Dermatophilus congolensis</i> | 1.82        | Buckleys        |
| 19-023-762 Swab   | <i>Dermatophilus congolensis</i> | 1.75        | St. Peters      |
| 19-019-Muri Swab  | <i>Dermatophilus congolensis</i> | 2.20        | Buckleys        |
| 19-017-Clev Scab  | <i>Dermatophilus congolensis</i> | 2.25        | Buckleys        |
| 19-028-763 Swab   | <i>Dermatophilus congolensis</i> | 1.81        | St. Peters      |
| 19-026-764 Swab   | <i>Dermatophilus congolensis</i> | 2.04        | St. Peters      |
| 19-040-358 Swab   | <i>Dermatophilus congolensis</i> | 2.11        | St. Pauls       |
| 19-030-774 Swab   | <i>Dermatophilus congolensis</i> | 1.81        | West Farm       |
| 19-033-BF2 Scab   | <i>Dermatophilus congolensis</i> | 2.01        | St. Peters      |
| 19-030-774 Scab   | <i>Dermatophilus congolensis</i> | 2.02        | West Farm       |
| 19-035-BF Scab    | <i>Dermatophilus congolensis</i> | 2.08        | St. Peters      |
| 19-036-BF3 Scab   | <i>Dermatophilus congolensis</i> | 1.75        | St. Peters      |
| 19-032-H1BF2 Swab | <i>Dermatophilus congolensis</i> | 1.84        | St. Peters      |
| 19-002-SBW Swab   | <i>Dermatophilus congolensis</i> | 1.77        | Milliken        |
| 19-002-SBW Scab   | <i>Dermatophilus congolensis</i> | 1.73        | Milliken        |
| 19-027-761 Swab   | <i>Dermatophilus congolensis</i> | 1.87        | St. Peters      |
| 19-024-767 Scab   | <i>Dermatophilus congolensis</i> | 2.11        | St. Peters      |
| 19-024-767 Swab   | <i>Dermatophilus congolensis</i> | 1.82        | St. Peters      |
| 19-028-763 Scab   | <i>Dermatophilus congolensis</i> | 1.90        | St. Peters      |
| 19-217-Clev Swab  | <i>Dermatophilus congolensis</i> | 1.82        | Buckleys        |
| 19-032-H1BF2 Swab | <i>Dermatophilus congolensis</i> | 1.98        | St. Peters      |
| 19-019 Muri Scab  | <i>Dermatophilus congolensis</i> | 2.17        | Buckleys        |
| 19-003-MBF 1 Swab | <i>Dermatophilus congolensis</i> | 1.70        | Milliken        |
